# Supplementary material
Source: PubMed Central journal article supplement (PMC4617412)
Supplement: Supp_Figure1.pdf [file Supp_Figure1.pdf]

# Supplementary Fig. S1

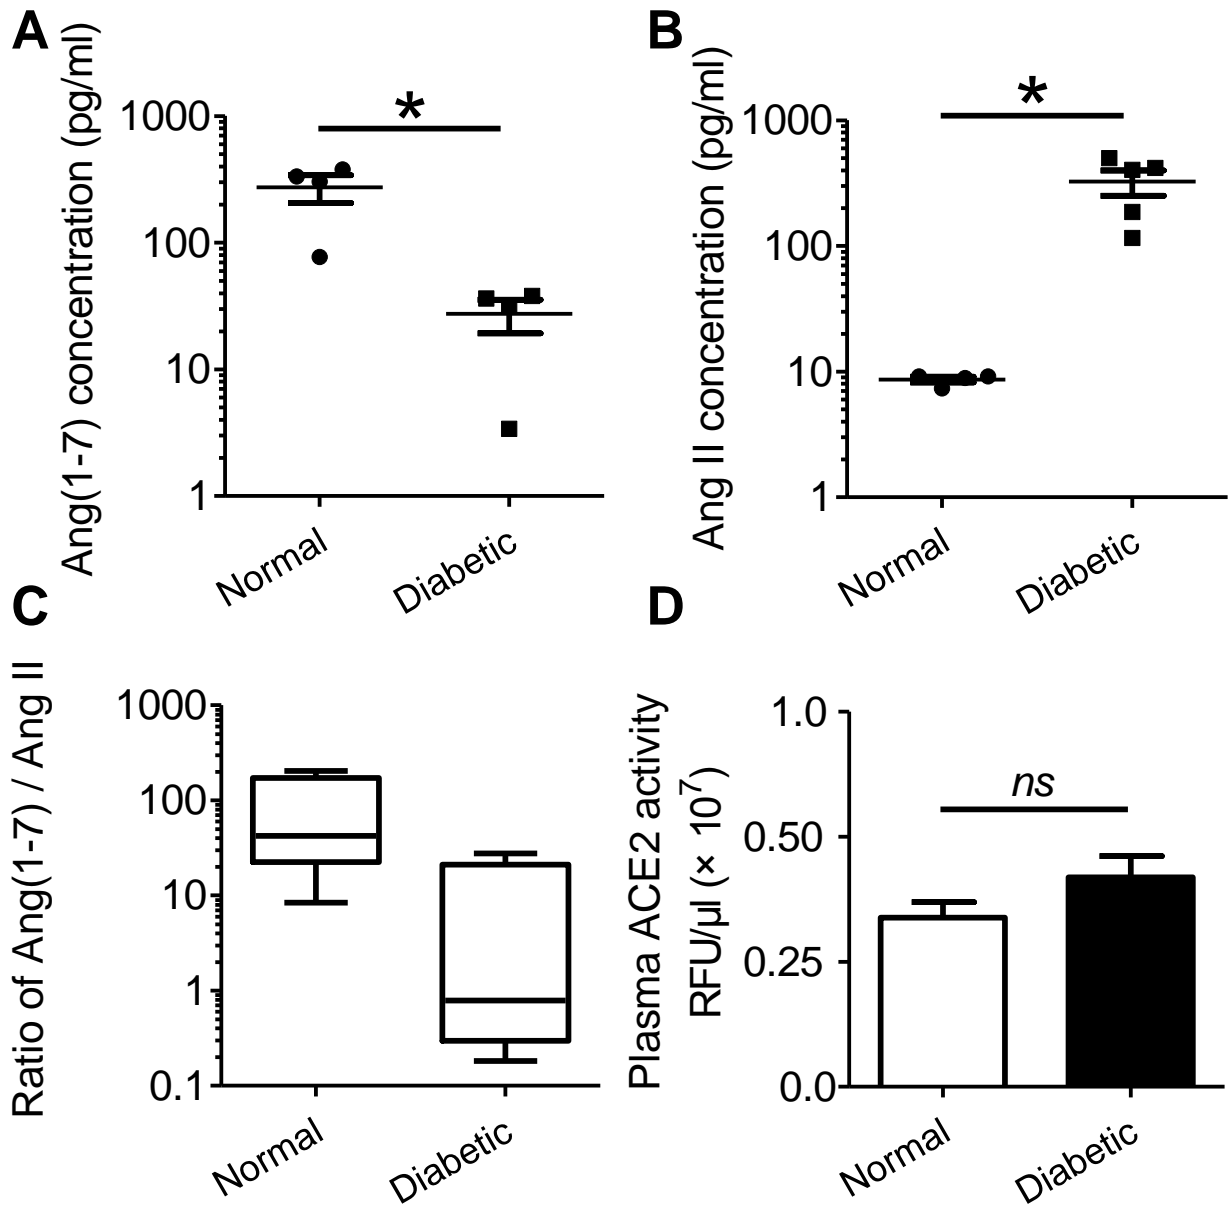

**Supplementary Fig. S1.** (A) Ang(1-7) , (B) Ang II concentration, (C) the one-to-one ratio of Ang(1-7)/Ang II, and (D) ACE2 activity in the plasma from non-diabetic (normal) and diabetic patients, n=4-6.
