# Supplementary material
Source: PubMed Central journal article supplement (PMC4617412)
Supplement: Supp_Figure2.pdf [file Supp_Figure2.pdf]

# Supplementary Fig. S2

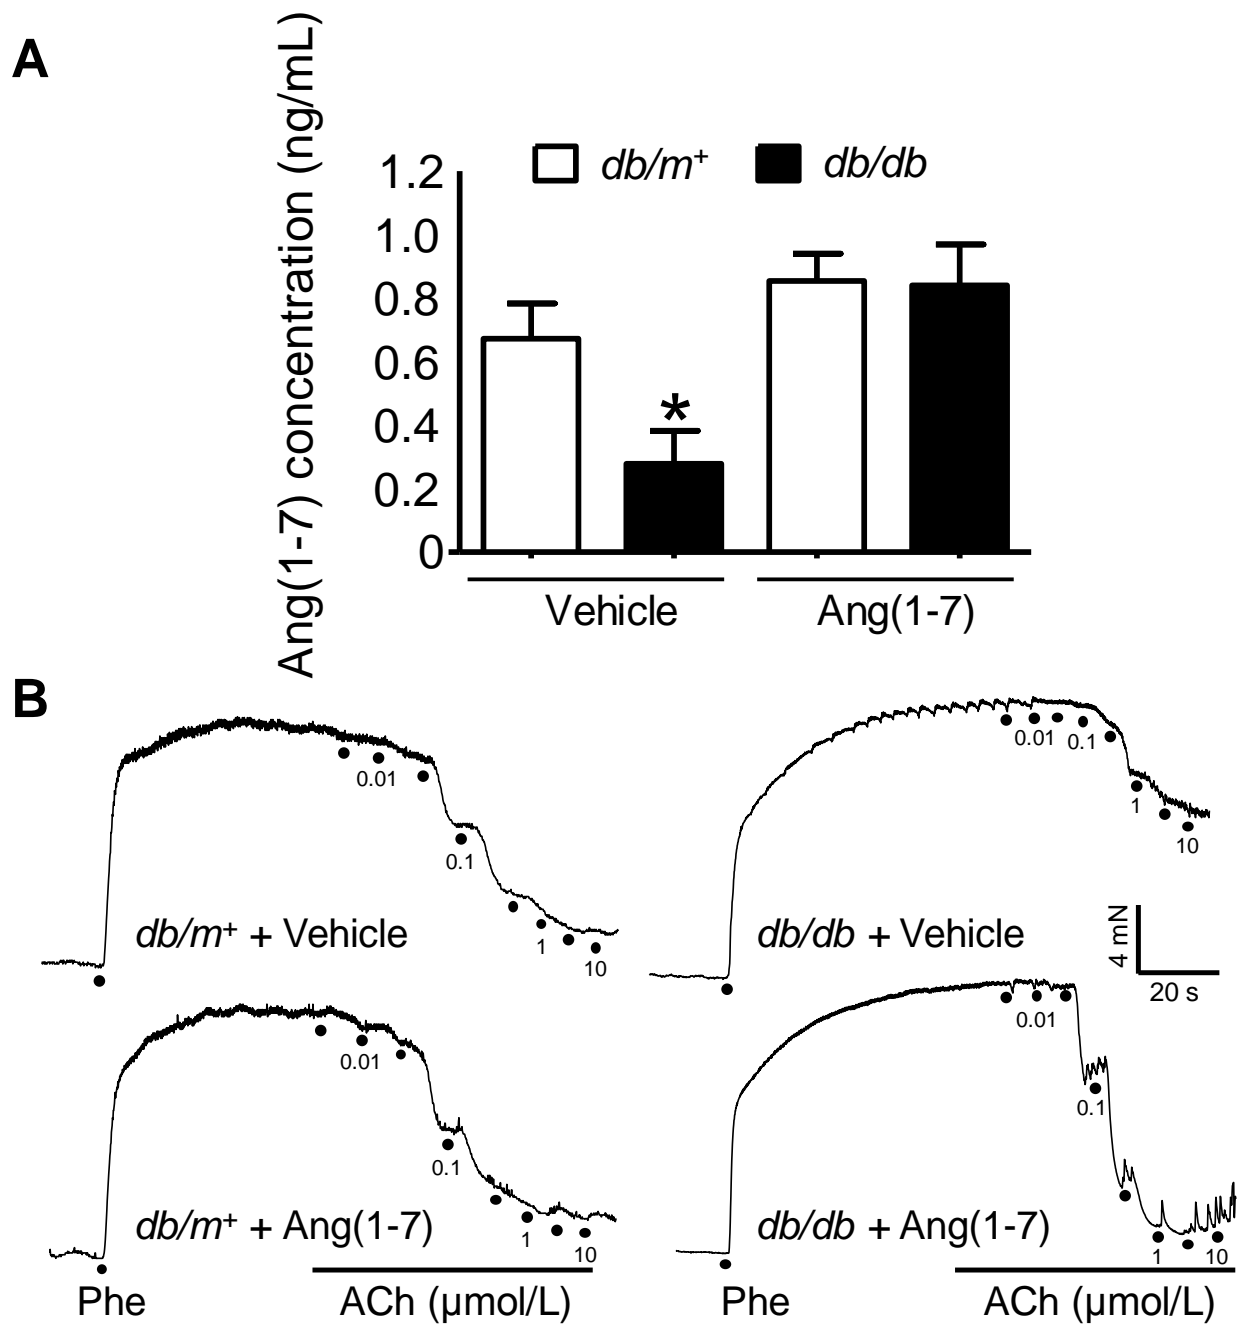

**Supplementary Fig. S2.** (A) The plasma Ang(1-7) level ( $n=4-6$ ,  $*p<0.05$  vs *db/db* + Ang(1-7)); (B) the representative traces of acetylcholine (ACh)-induced endothelium-dependent relaxations after phenylephrine (Phe, 1  $\mu\text{mol/L}$ )-induced contraction in aortas, from *db/m+* and *db/db* mice chronically infused with/without Ang(1-7). Calibration bars apply to all traces.
