# Supplementary material
Source: PubMed Central journal article supplement (PMC4617412)
Supplement: Supp_Figure4.pdf [file Supp_Figure4.pdf]

# Supplementary Fig. S4

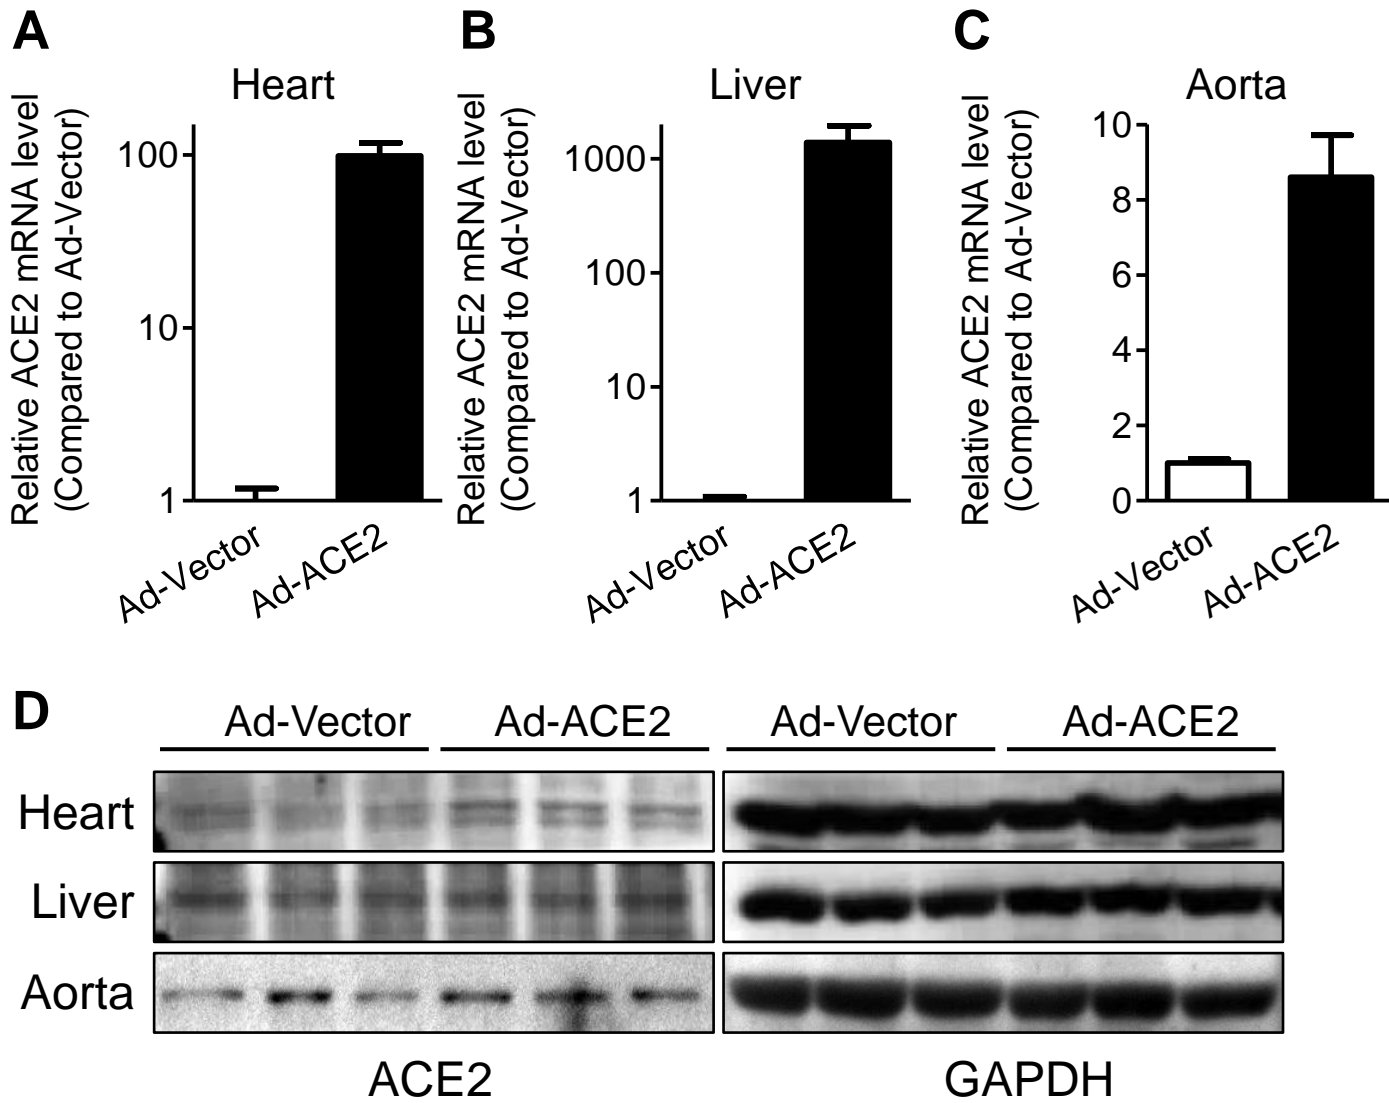

**Supplementary Fig. S4.** The expression of ACE2 on mRNA (**A**, **B**, **C**) and protein level (**D**) in different tissues from *db/db* mice injected with adenoviral vector (Ad-Vector) and adenoviral ACE2 (Ad-ACE2) particles, n=3.
