# Supplementary material
Source: PubMed Central journal article supplement (PMC4617412)
Supplement: Supp_Figure6.pdf [file Supp_Figure6.pdf]

# Supplementary Fig. S6

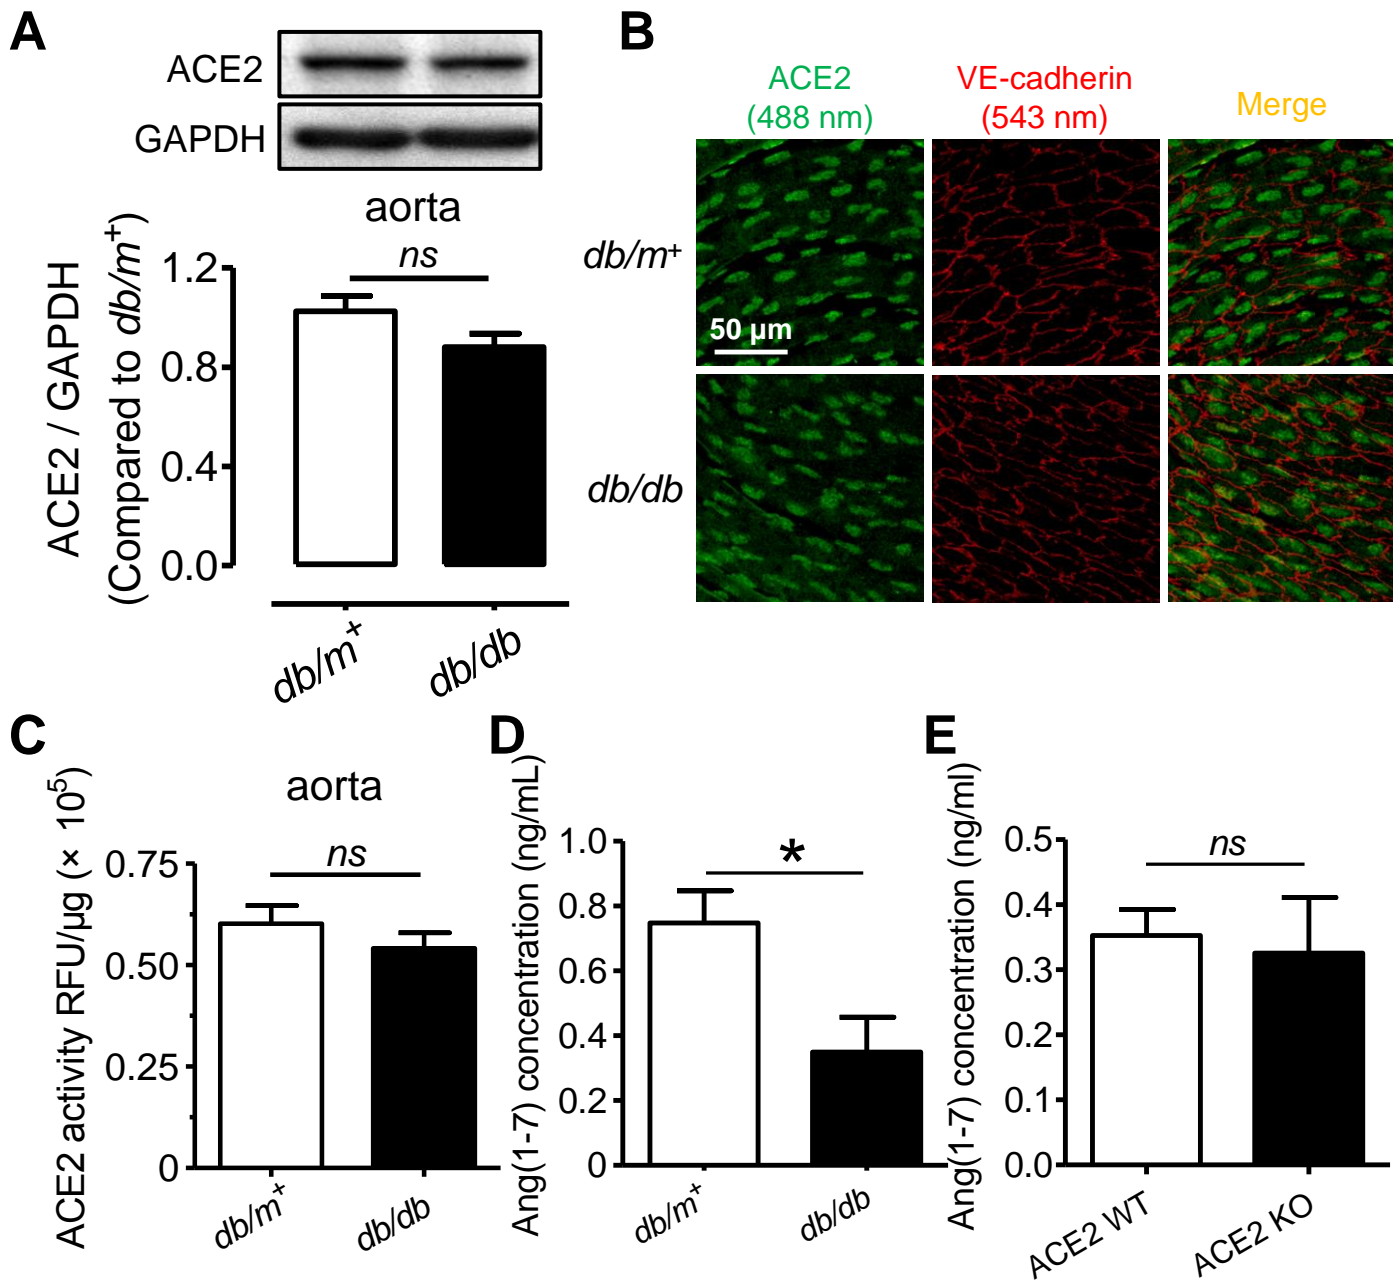

**Supplementary Fig. S6.** The ACE2 expression shown by (A) western blotting and (B) immunofluorescence, (C) ACE2 activity in aortas and (D) plasma Ang(1-7) level from *db/m*<sup>+</sup> and *db/db* mouse. (E) Plasma Ang(1-7) level in ACE2 WT and KO mice. Green: ACE2 fluorescence (Excitation: 488 nm, Emission: 525 nm), Red: VE-cadherin fluorescence (Excitation: 543 nm, Emission: 565 nm). Data are means  $\pm$  SEM of 4-5 mice. \* $p < 0.05$ .
