# Supplementary material
Source: PubMed Central journal article supplement (PMC4617412)
Supplement: Supp_Figure7.pdf [file Supp_Figure7.pdf]

# Supplementary Fig. S7

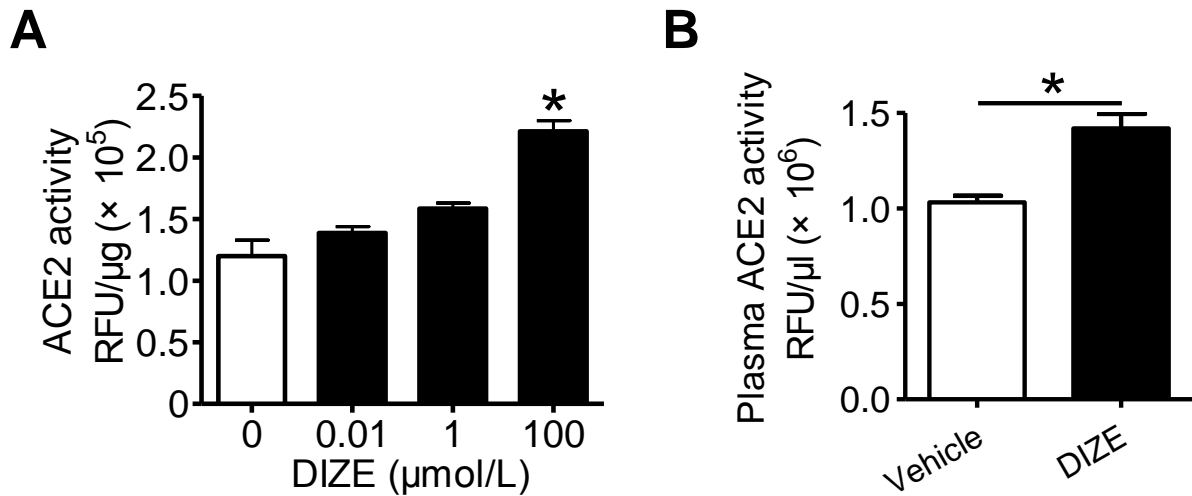

**Supplementary Fig. S7. (A)** The activity of ACE2 in human umbilical vein endothelial cells (HUVECs) following 24-hour exposure to diminazene aceturate (DIZE) at different concentration. **(B)** Plasma ACE2 activity in *db/db* mice treated with vehicle or DIZE (15mg/kg/day) for 2 weeks. Data are means  $\pm$  SEM from 6 individual samples. \* $p < 0.05$ .
