# Supplementary material
Source: PubMed Central journal article supplement (PMC4617412)
Supplement: Supp_Figure9.pdf [file Supp_Figure9.pdf]

# Supplementary Fig. S9

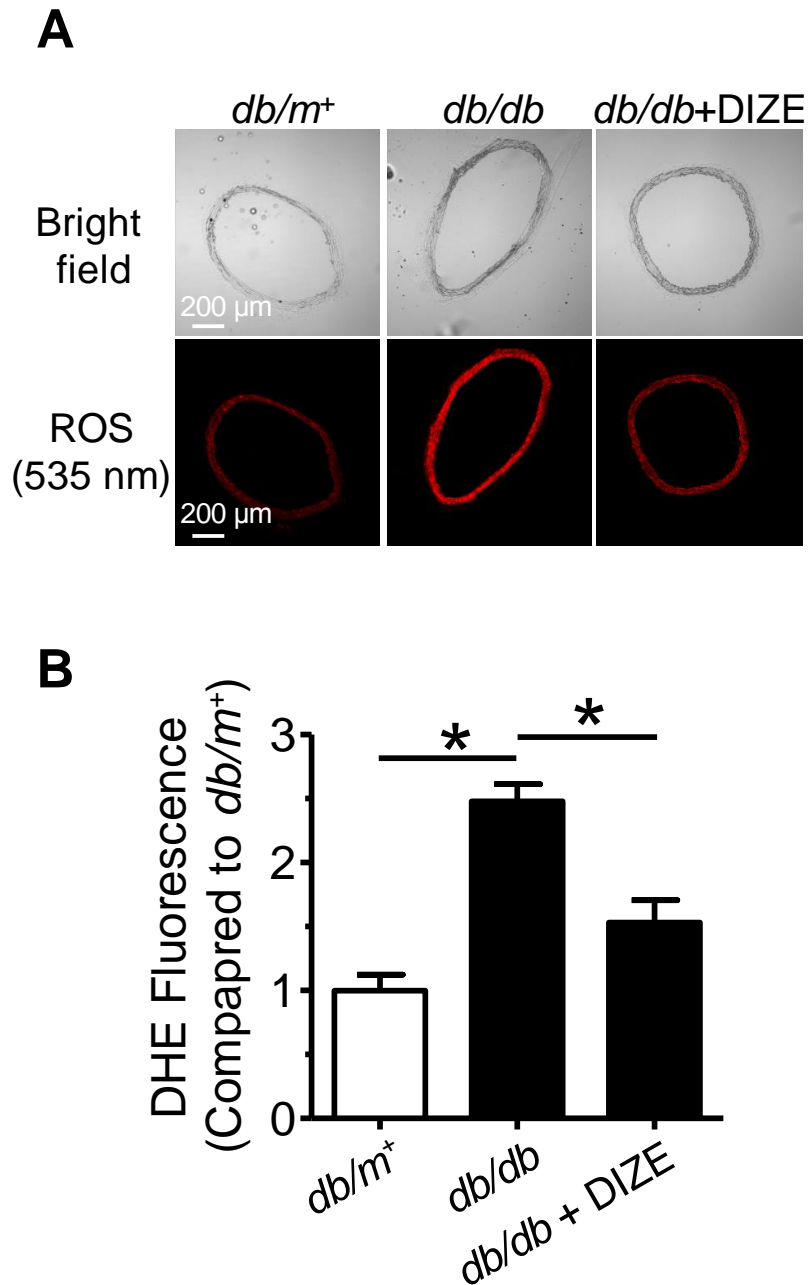

**Supplementary Fig. S9.** Reactive oxygen species (ROS) measurement in cross-sections of mouse aortic rings by dihydroethidium (DHE) staining. **(A)** Representative images and **(B)** quantitative fluorescence intensity exhibiting the changes in the DHE signal in aortas from *db/m<sup>+</sup>*, *db/db*, and DIZE treated *db/db* mice (15 mg/kg/day, 14 days). Data are means  $\pm$  SEM of 5-6 mice. \* $p$ <0.05.
