# Supplementary material
Source: PubMed Central journal article supplement (PMC4617412)
Supplement: Supp_Figure11.pdf [file Supp_Figure11.pdf]

# Supplementary Fig. S11

**A**

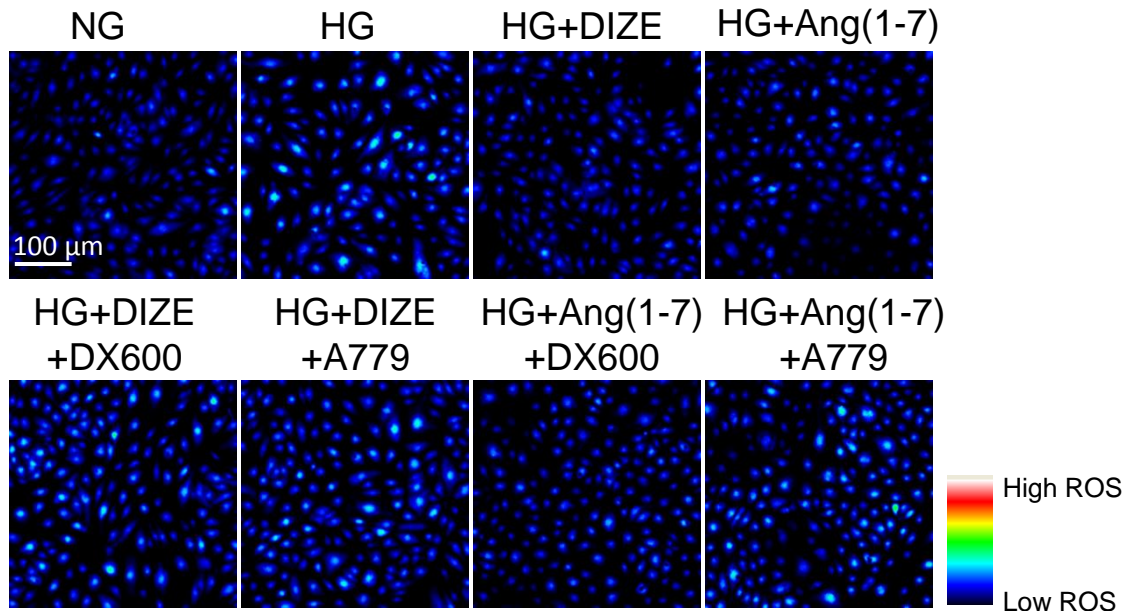

**B**

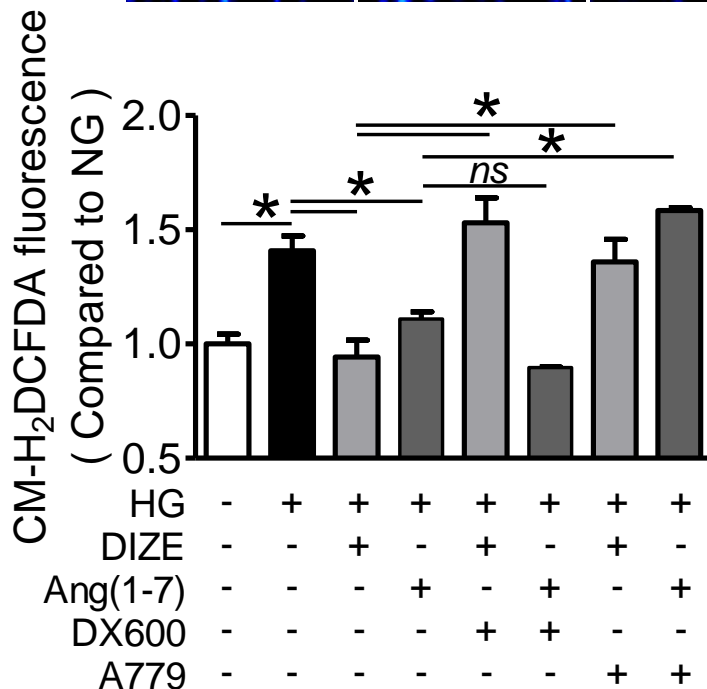

**C**

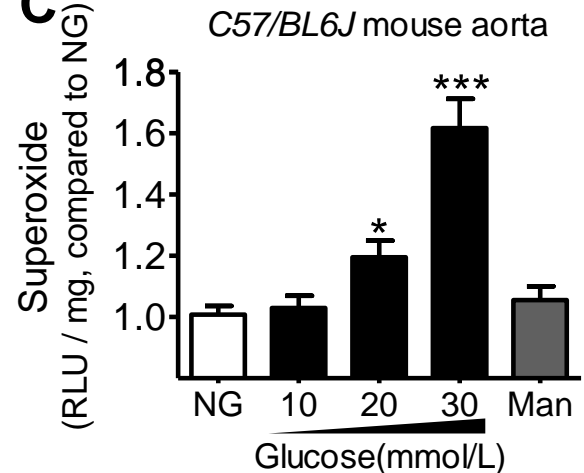

**Supplementary Fig. S11.** ROS level measured by CM-H<sub>2</sub>DCFDA fluorescence dye in HUVECs following various treatments as shown above the images. NG: normal glucose, 5 mmol/L; HG: high glucose, 30mmol/L; DIZE: 100 μmol/L; Ang(1-7): 1 μmol/L; DX600: 1 μmol/L; A779: 1 μmol/L. **(A)** Representative fluorescence images and **(B)** summarized data showing HG-stimulated ROS production in HUVECs after different treatments. Data are means ± SEM from 6 individual experiments. \**p*<0.05. **(C)** Superoxide anion production measured by chemiluminescence in C57BL/6J mouse aortas following exposure to glucose at different concentration and manitol (30 mmol/L) for 48 hours. RLU: relative luminescence units, n=4, \**p*<0.05.
