# Supplementary material
Source: PubMed Central journal article supplement (PMC4617412)
Supplement: Supp_Figure13.pdf [file Supp_Figure13.pdf]

# Supplementary Fig. S13

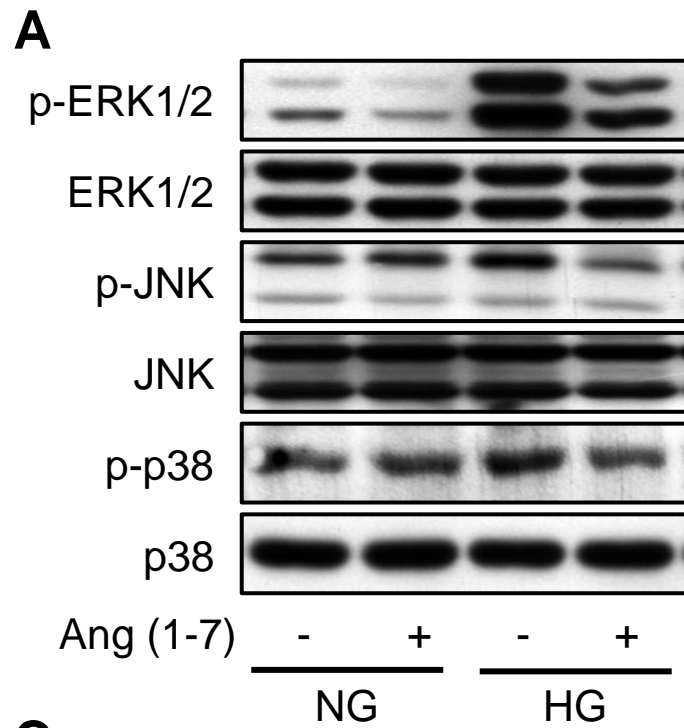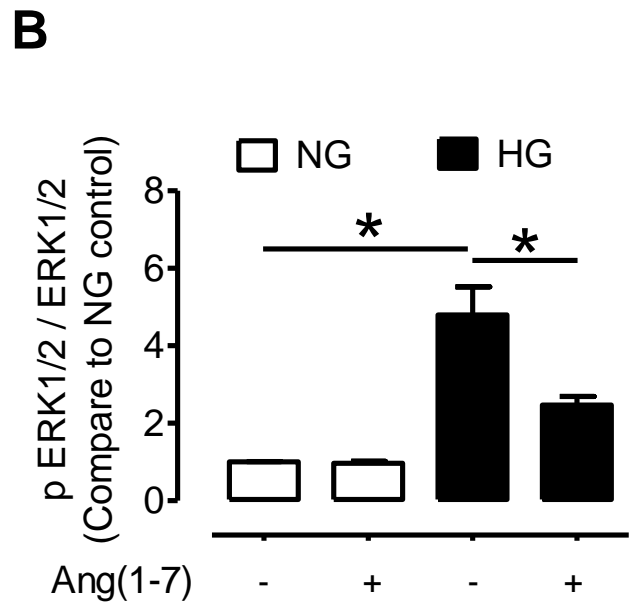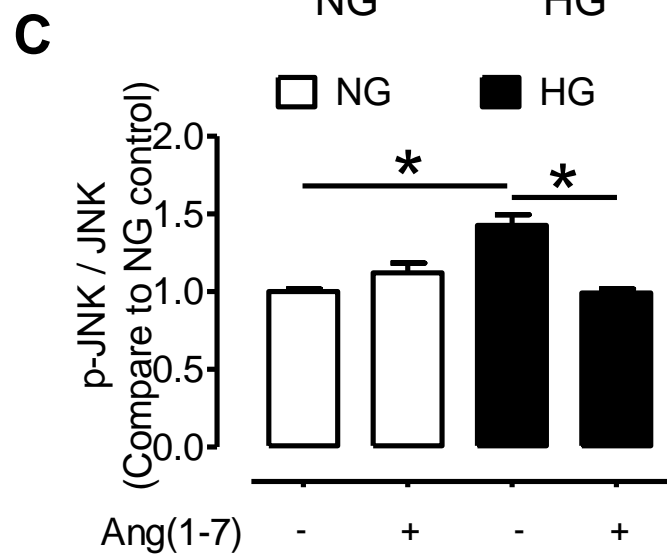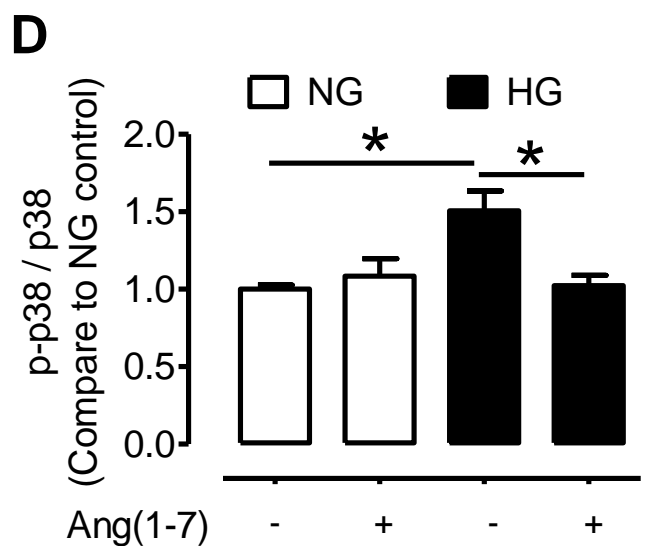

**Supplementary Fig. S13.** (A) Representative blots and (B-D) summarized data showing the phosphorylation of MAPK family members (ERK1/2, p38, JNK) in HUVECs treated with NG(5 mmol/L), Ang (1-7) (1 μmol/L), HG (30 mmol/L), HG+Ang (1-7) for 48 hours. Data are means ± SEM from 4 individual experiments, \**p*<0.05.
