# Supplementary material
Source: PubMed Central journal article supplement (PMC4617412)
Supplement: Supp_Figure14.pdf [file Supp_Figure14.pdf]

# Supplementary Fig. S14

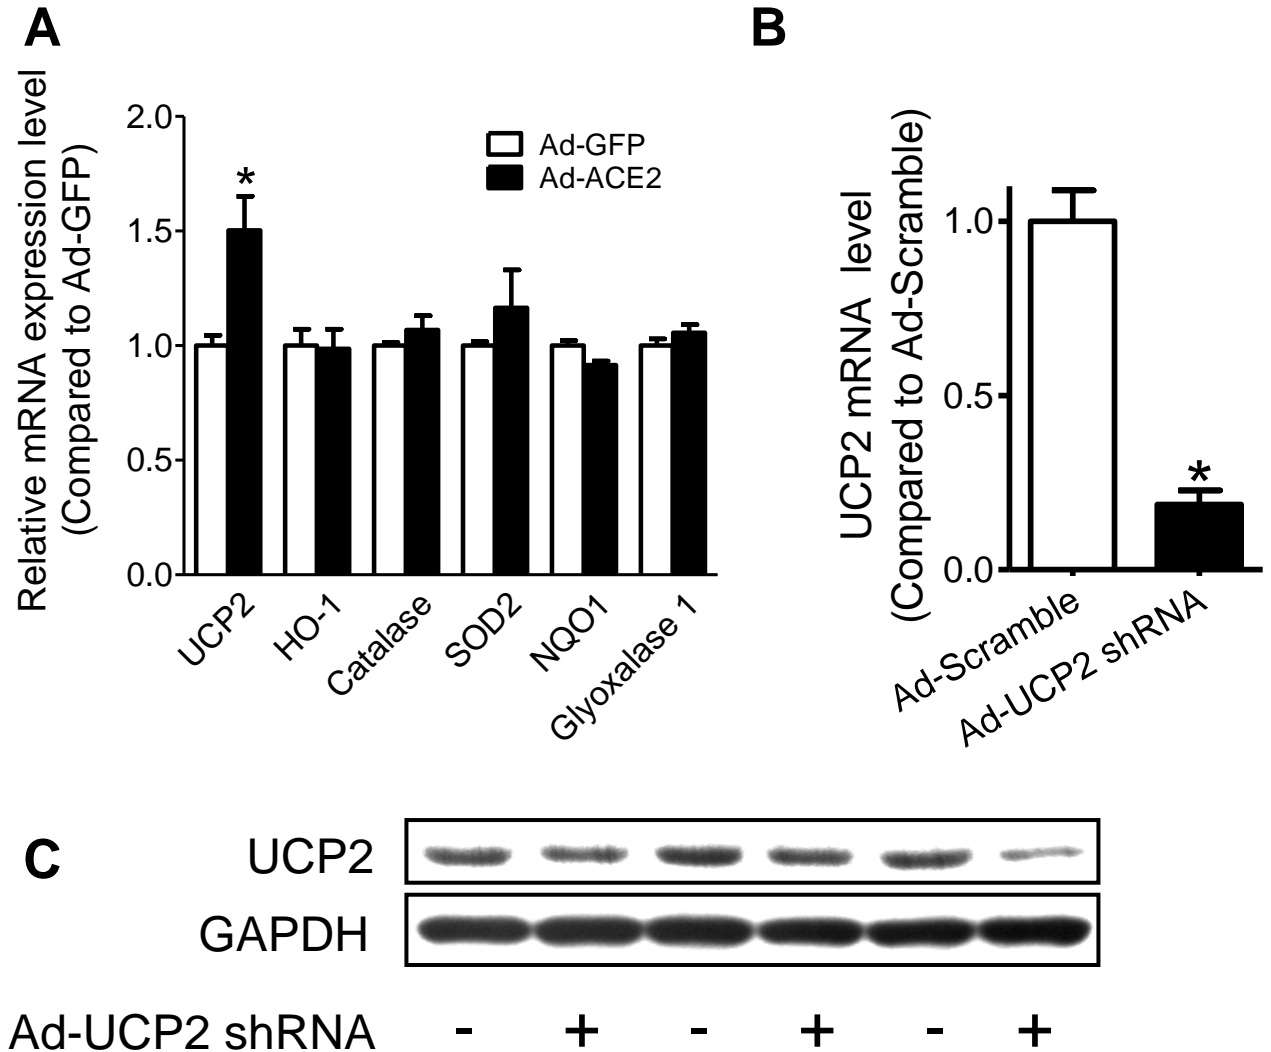

**Supplementary Fig. S14.** (A) Representative antioxidant genes expression in human aortic endothelial cells (HAECs) after transduction with Ad-GFP and Ad-ACE2 for 24 hours. (B) The mRNA and (C) protein expression in HAECs after exposure to adenoviral UCP2 shRNA (Ad-UCP2 shRNA) for 48 hours.  $n=3$ ,  $*p<0.05$ .
