# Supplementary material
Source: PubMed Central journal article supplement (PMC4617412)
Supplement: Supp_Figure15.pdf [file Supp_Figure15.pdf]

# Supplementary Fig. S15

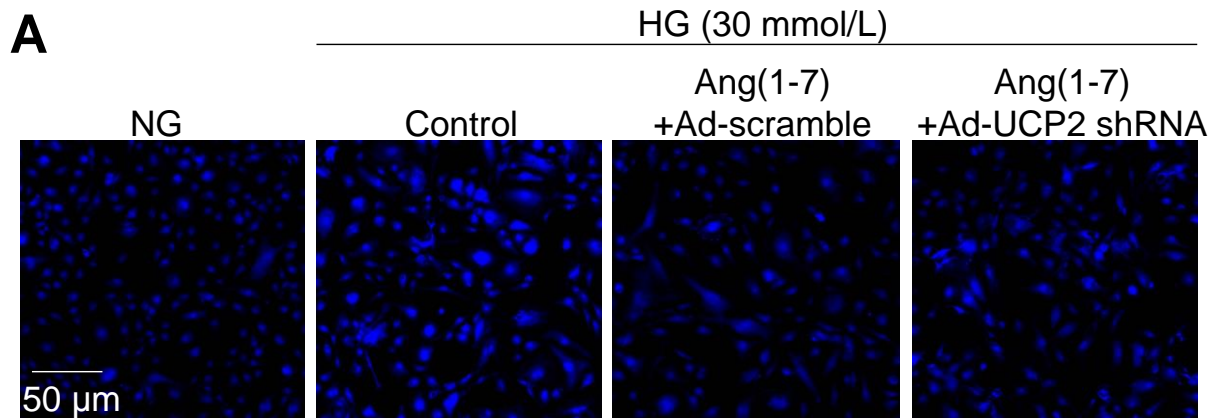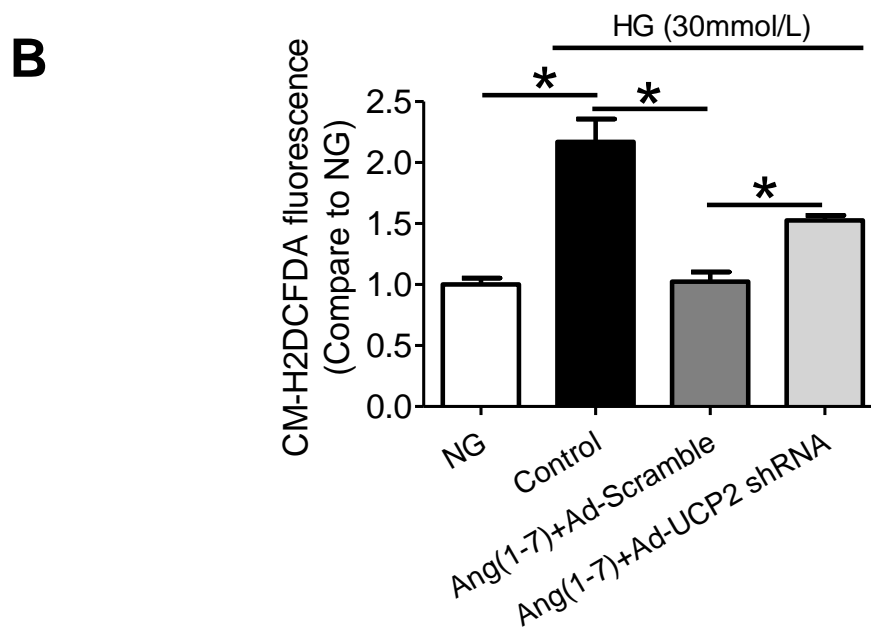

**Supplementary Fig. S15. (A)** Representative fluorescence images and **(B)** summarized data showing HG-stimulated ROS production in HAECs after different treatments. HG: 30 mmol/L, 48 hours. Ang(1-7): 1 μmol/L. Data are means ± SEM from 4 individual experiments. \* $p < 0.05$ .
