# Supplementary material
Source: PubMed Central journal article supplement (PMC4617412)
Supplement: Supp_Table2.pdf [file Supp_Table2.pdf]

**Table 2 q-PCR primers**

| <b>Primers for human genes</b> | <b>Forward</b>          | <b>Reverse</b>         |
|--------------------------------|-------------------------|------------------------|
| <b>GAPDH</b>                   | CCACTCCTCCACCCTTTGAC    | ACCCTGTTGCTGTAGCCA     |
| <b>ACE2</b>                    | CGAAGCCGAAGACCTGTTCTA   | GGCAAGTGTGGACTGTTCC    |
| <b>UCP2</b>                    | CCCCGAAGCCTCTACAATGG    | CTGAGCTTGGAAATCGGACCTT |
| <b>HO-1</b>                    | TGGAGACTCCCAGAGGGAAG    | GGGAAGATGCCATAGGCTCC   |
| <b>Catalase</b>                | TGGGATCTCGTTGGAAATAACAC | TCAGGACGTAGGCTCCAGAAG  |
| <b>SOD2</b>                    | TTTCAATAAGGAACGGGGACAC  | GTGCTCCACACATCAATCC    |
| <b>NQO1</b>                    | GAAGAGCACTGATCGTACTGGC  | GGATACTGAAAGTTCGCAGGG  |
| <b>Glyoxalase 1</b>            | AGCAGACCATGCTACGAGTGA   | GAGAGCCGCCAGGCTATTT    |
